# Supplementary material for: The epidemiological characteristic and trends of burns globally
Source: PubMed Central journal article supplement (PMC9396832; doi:10.1186/s12889-022-13887-2), 2022-08-22

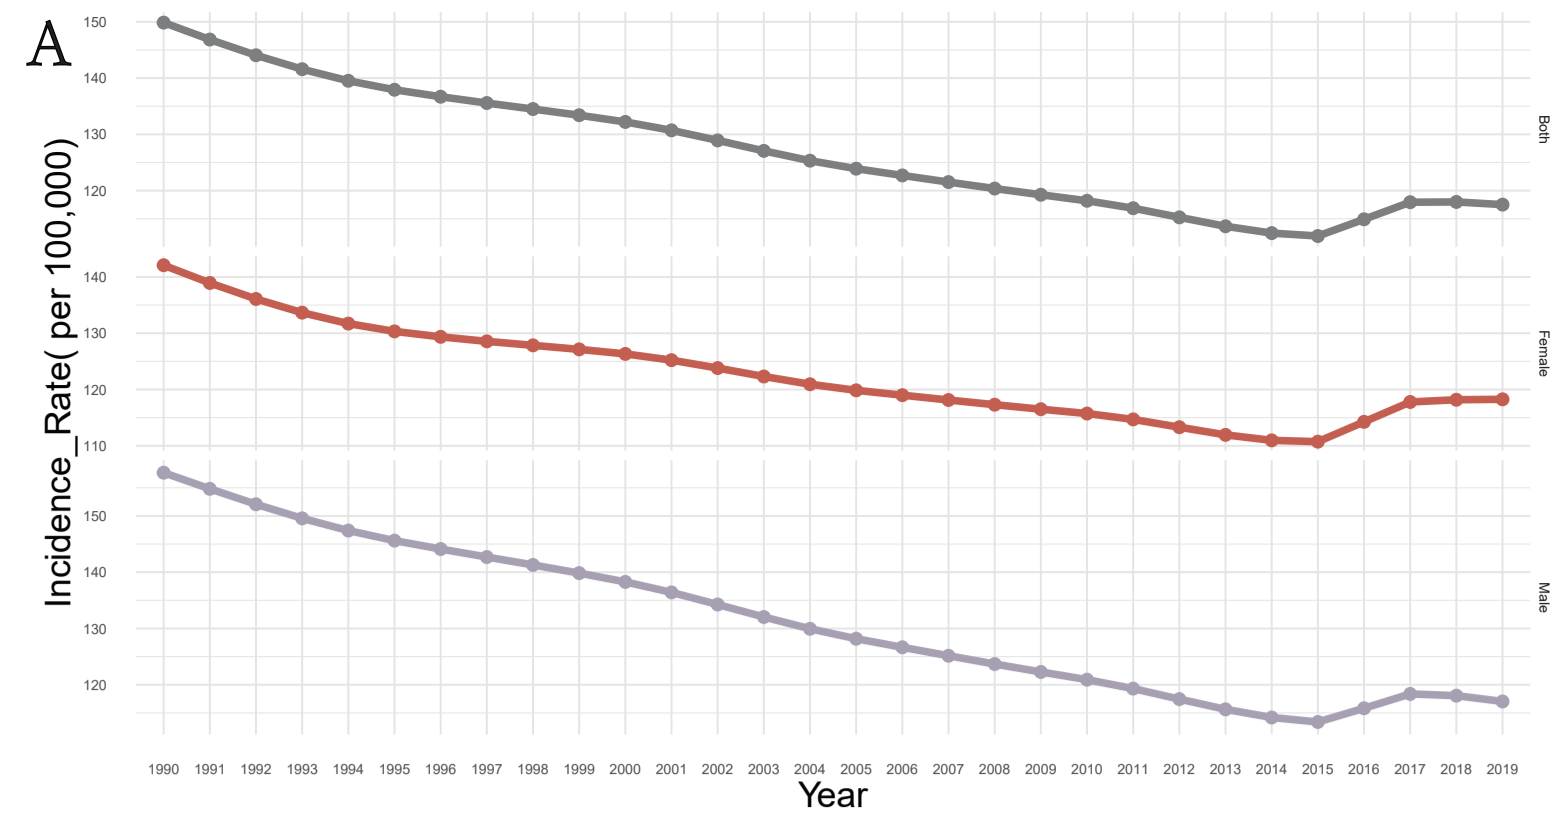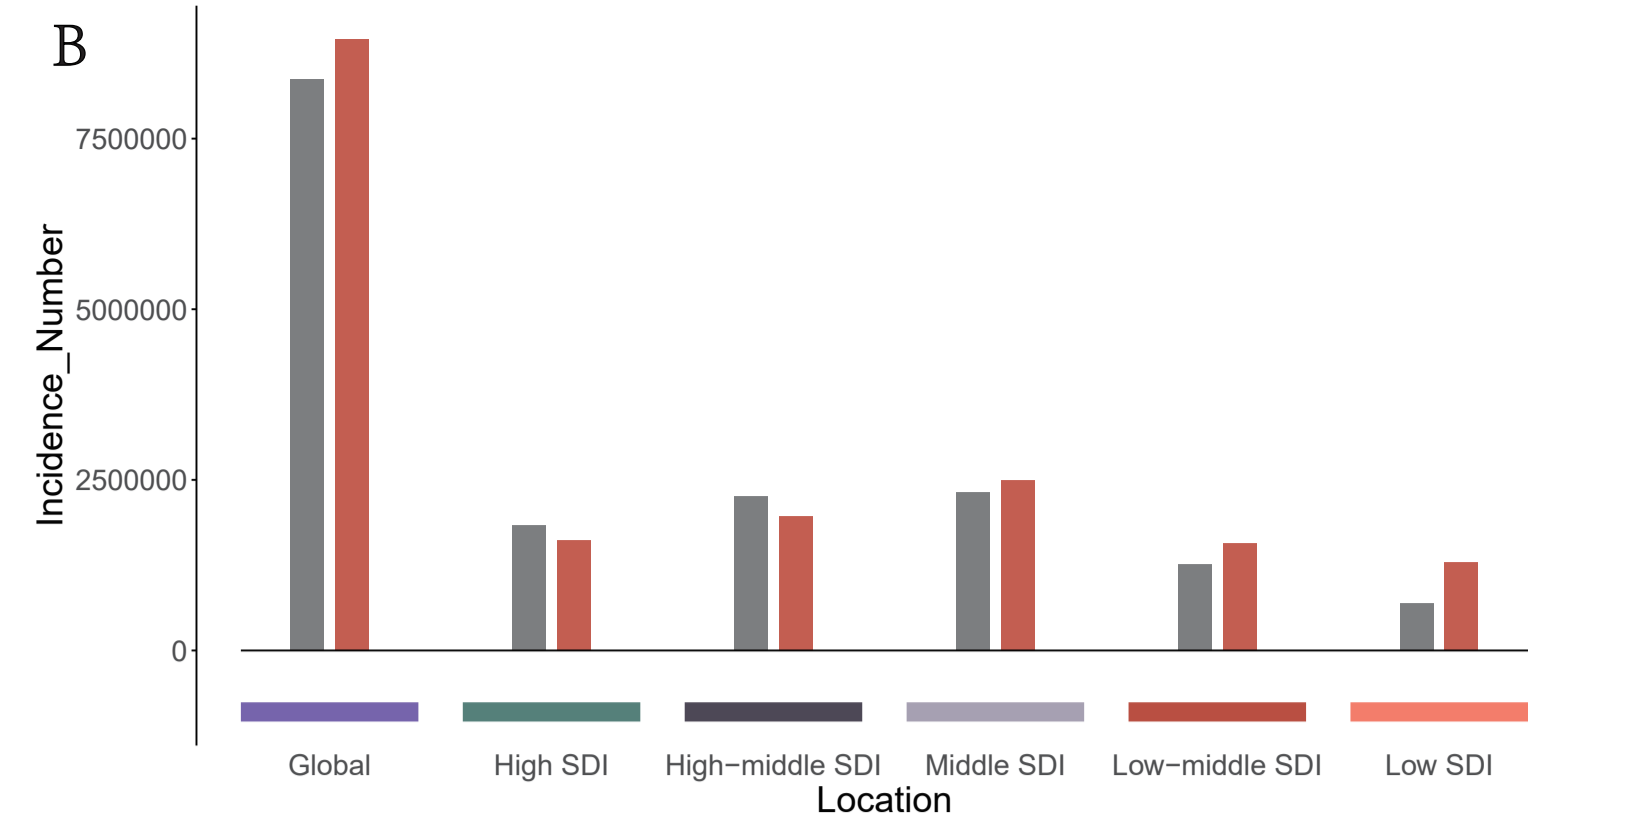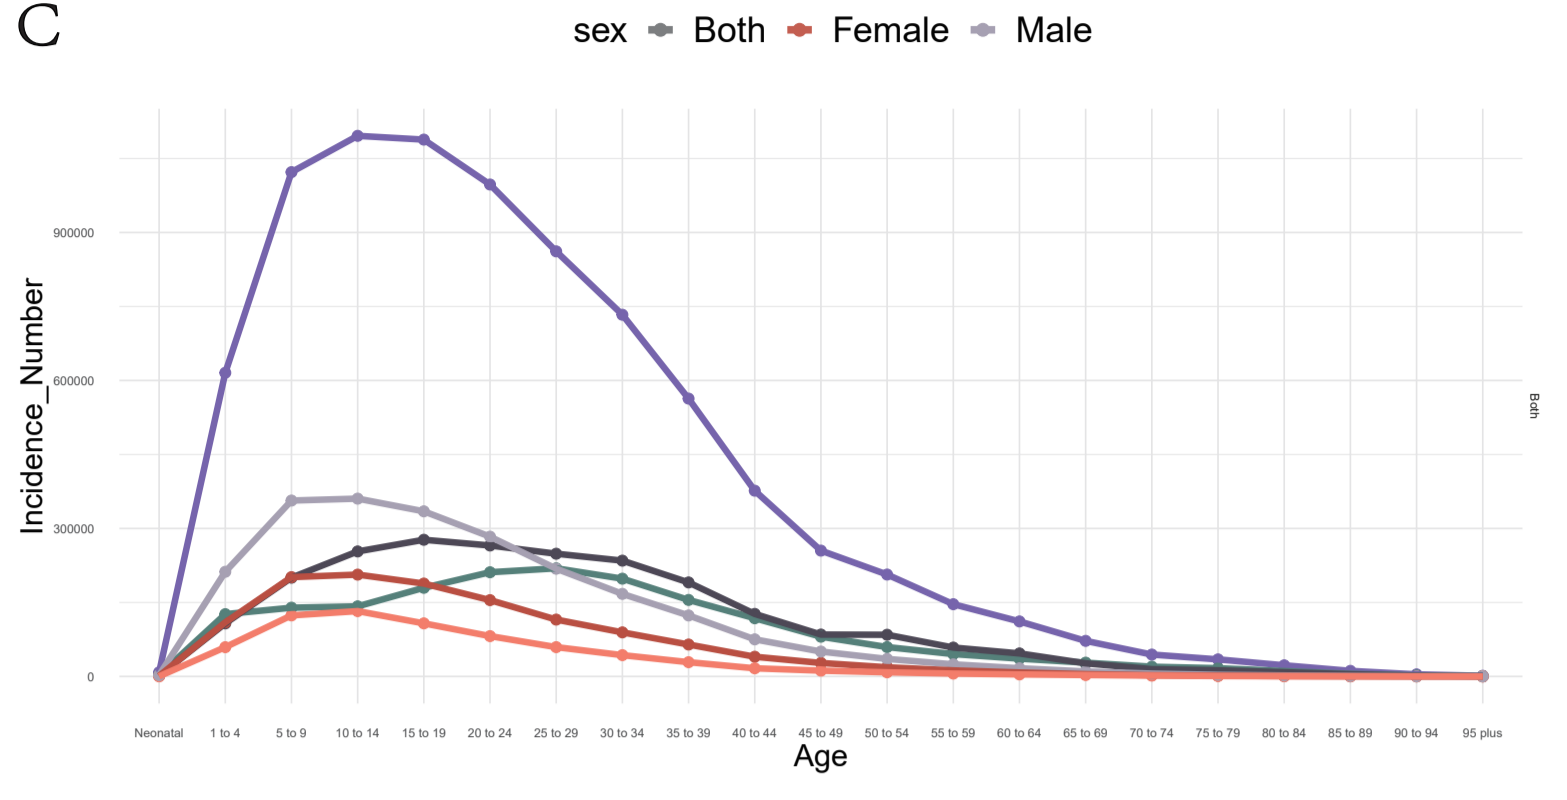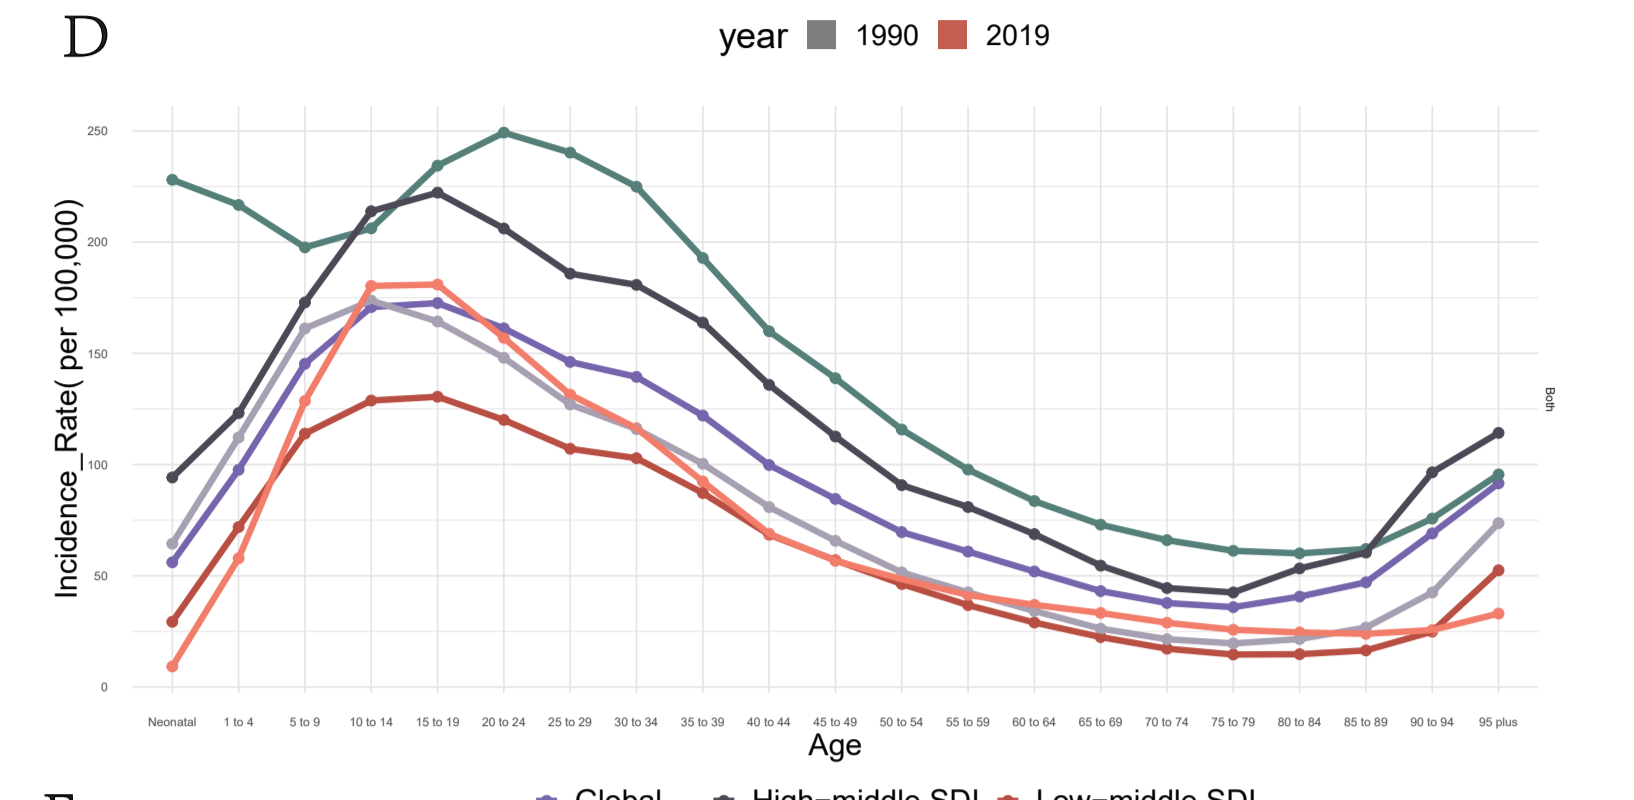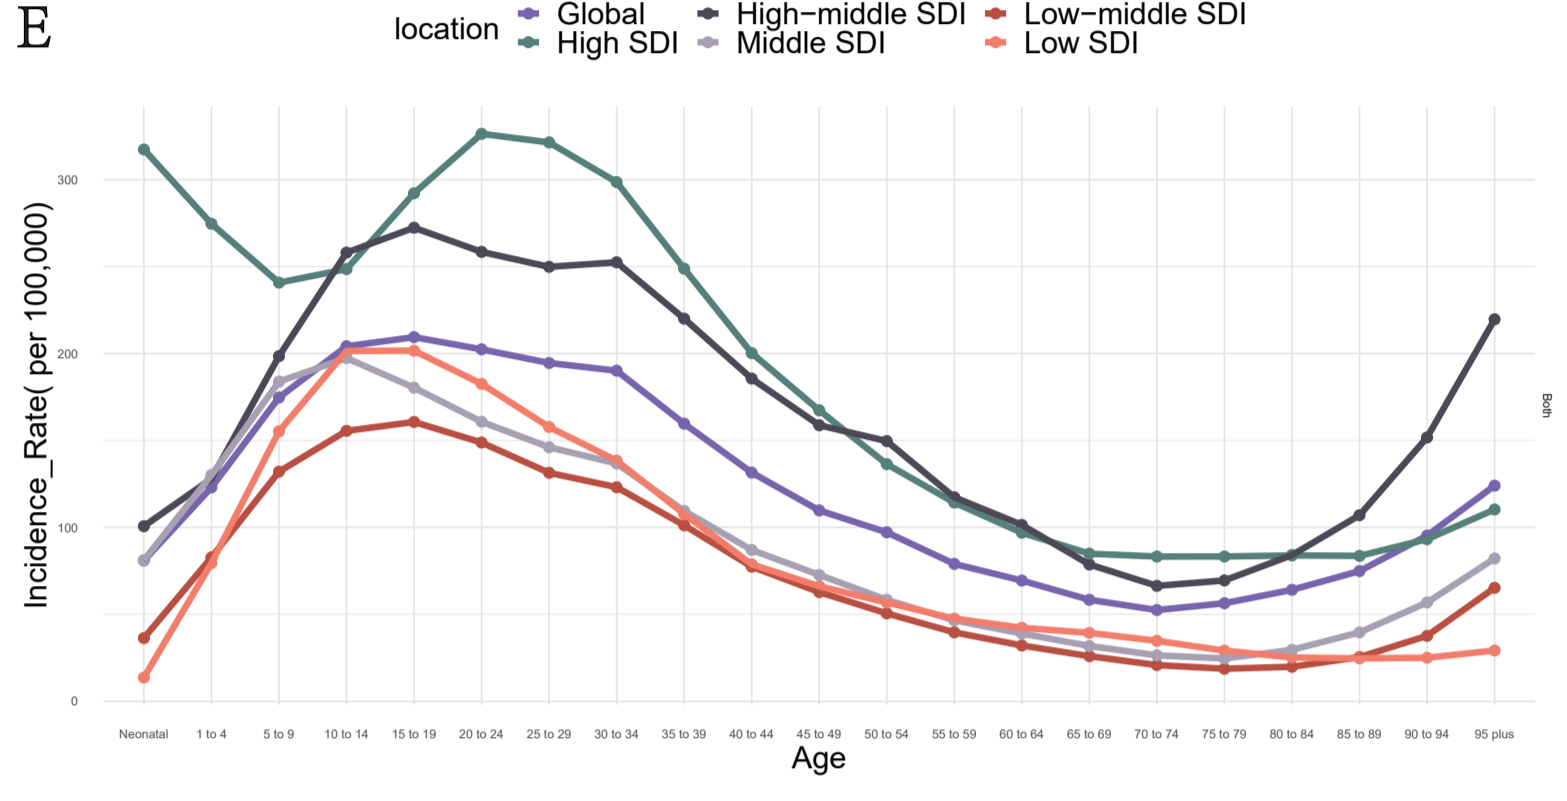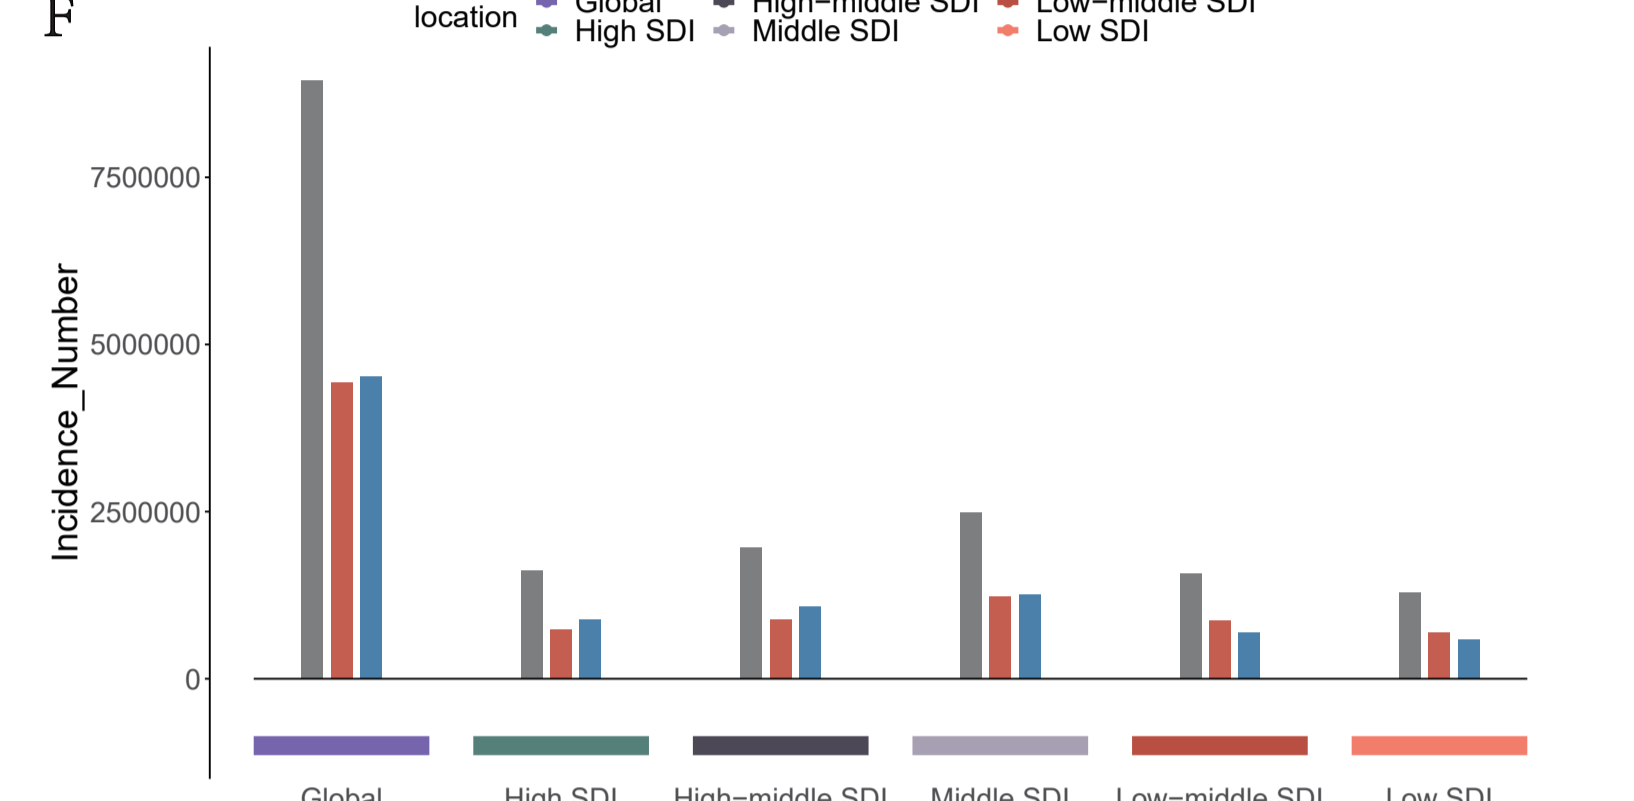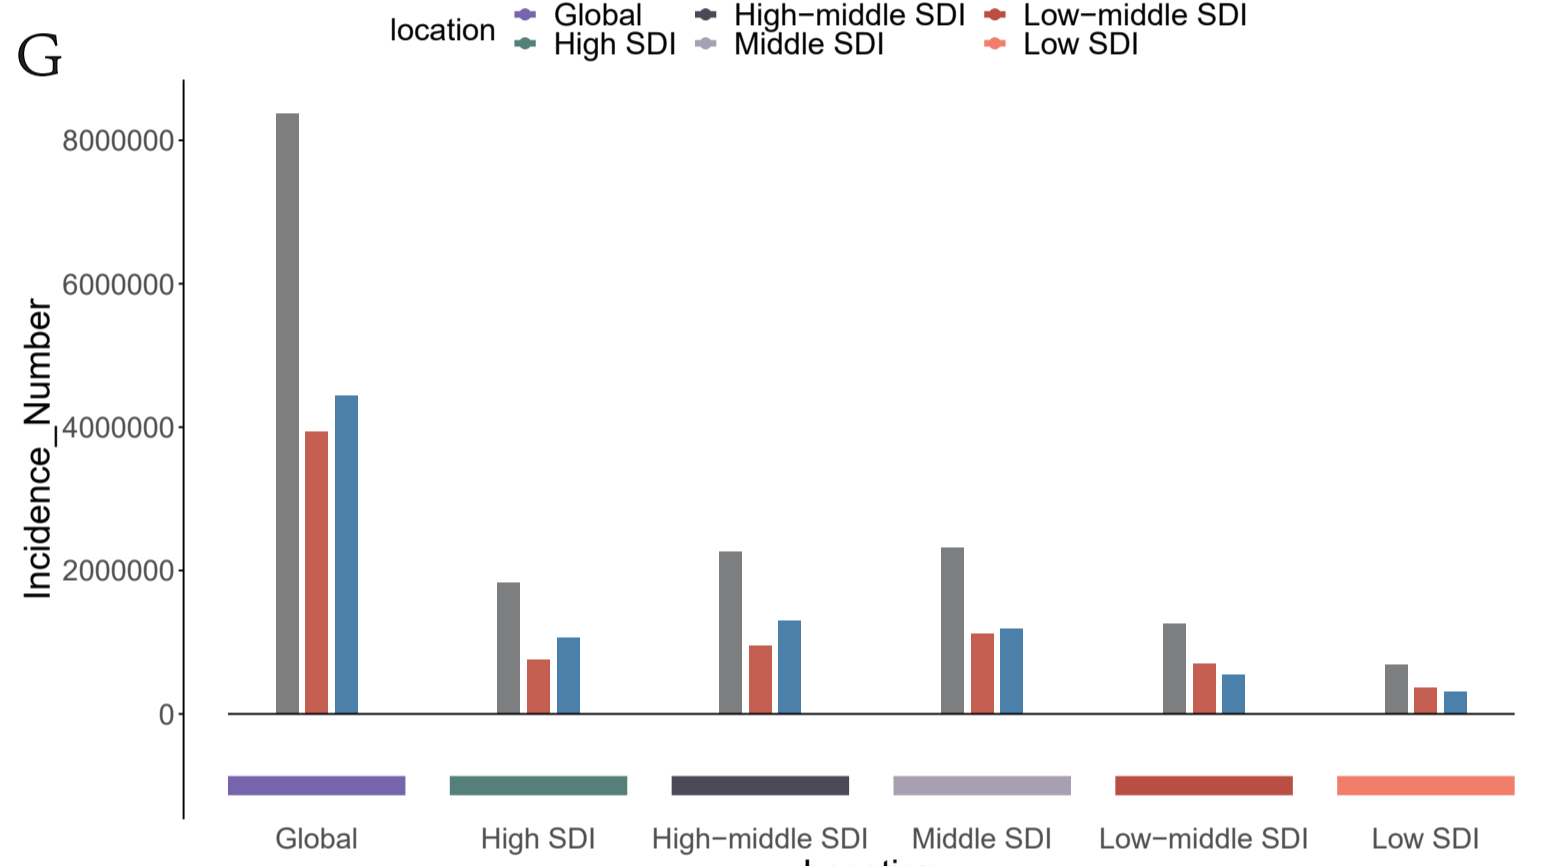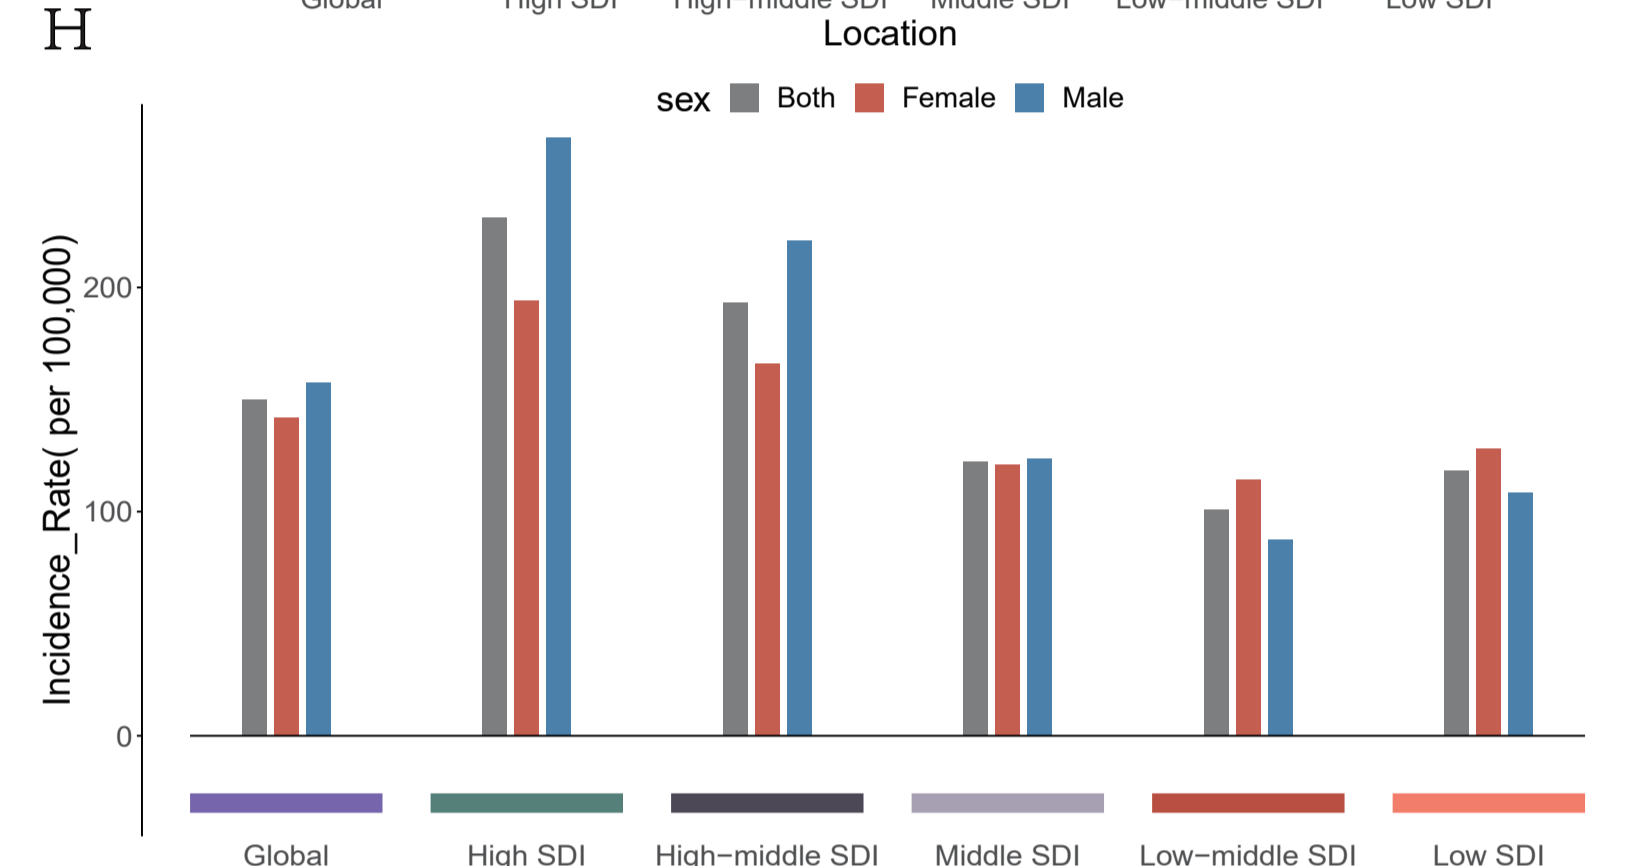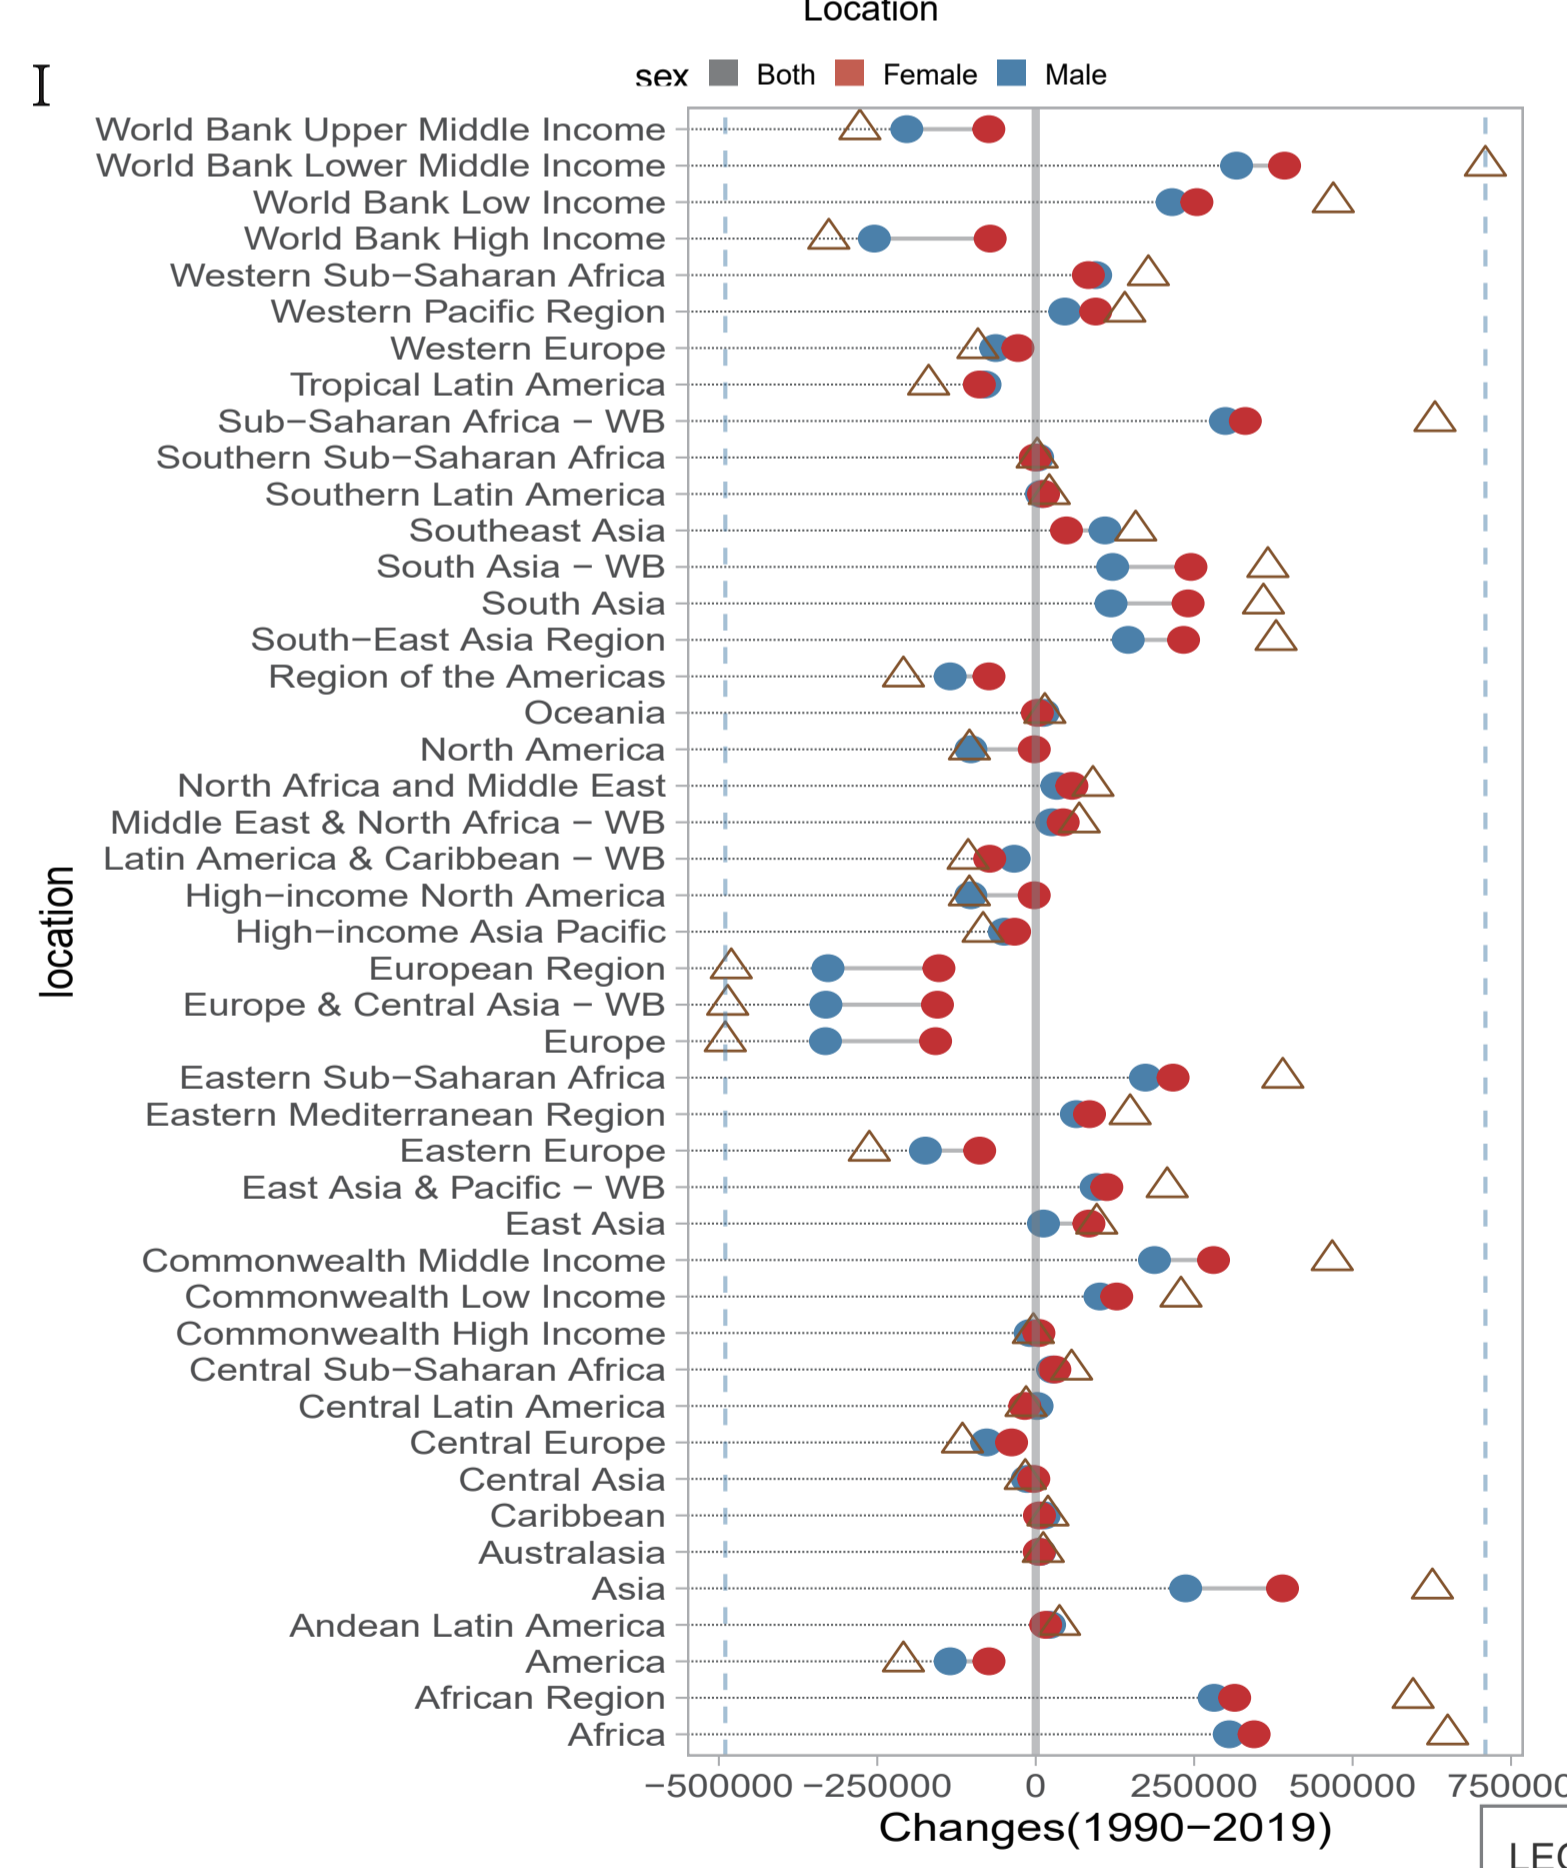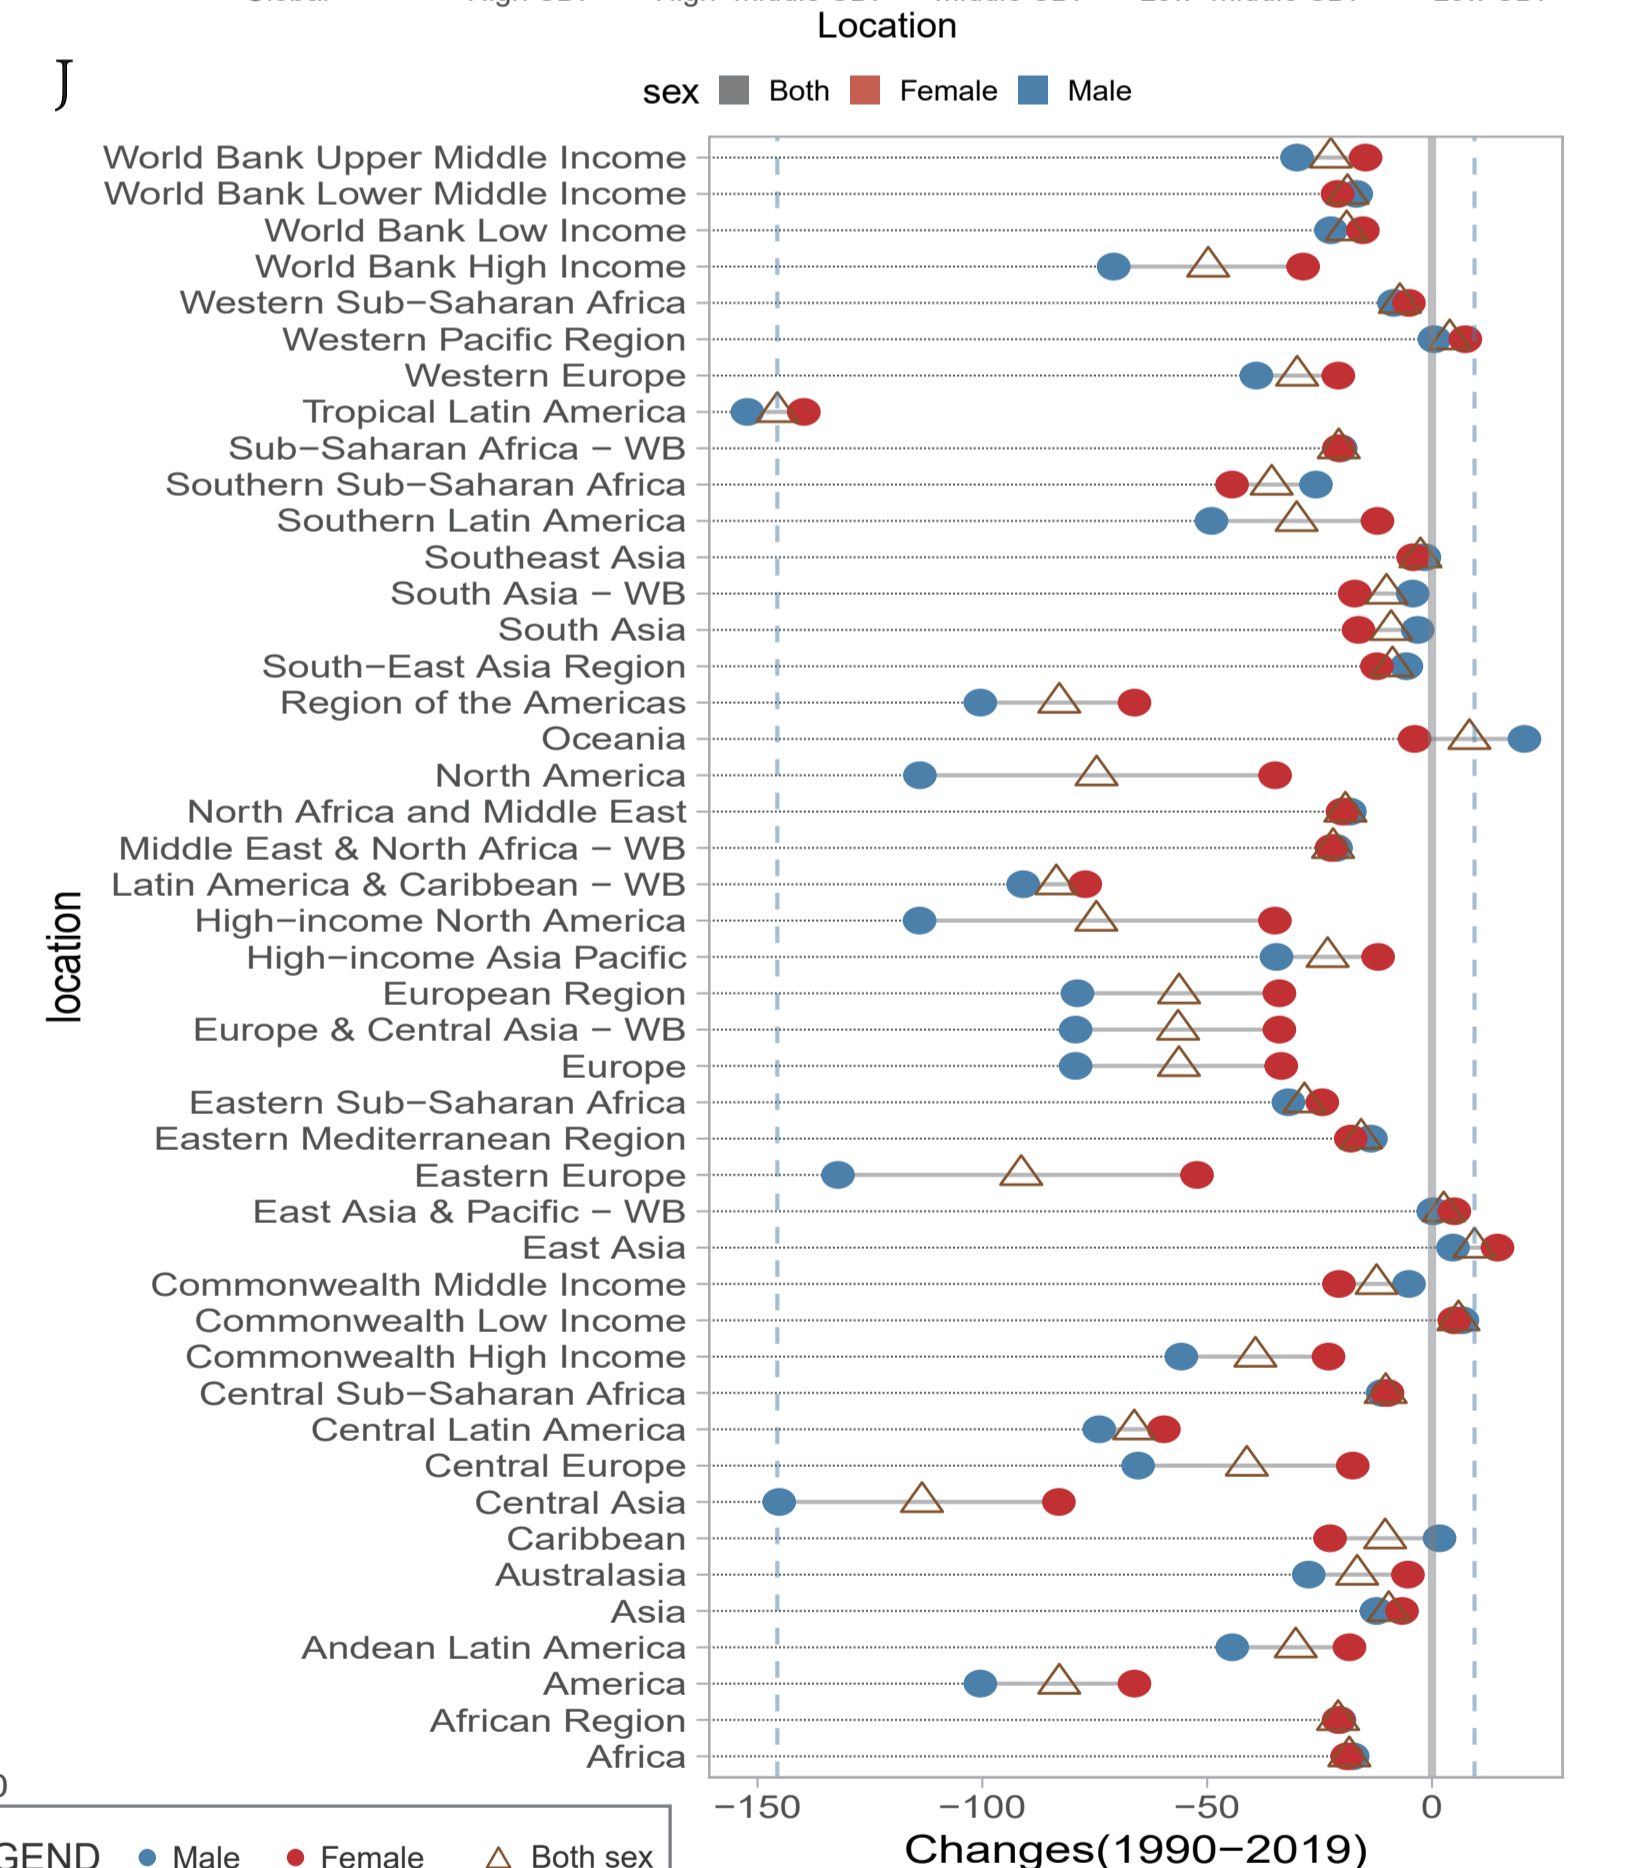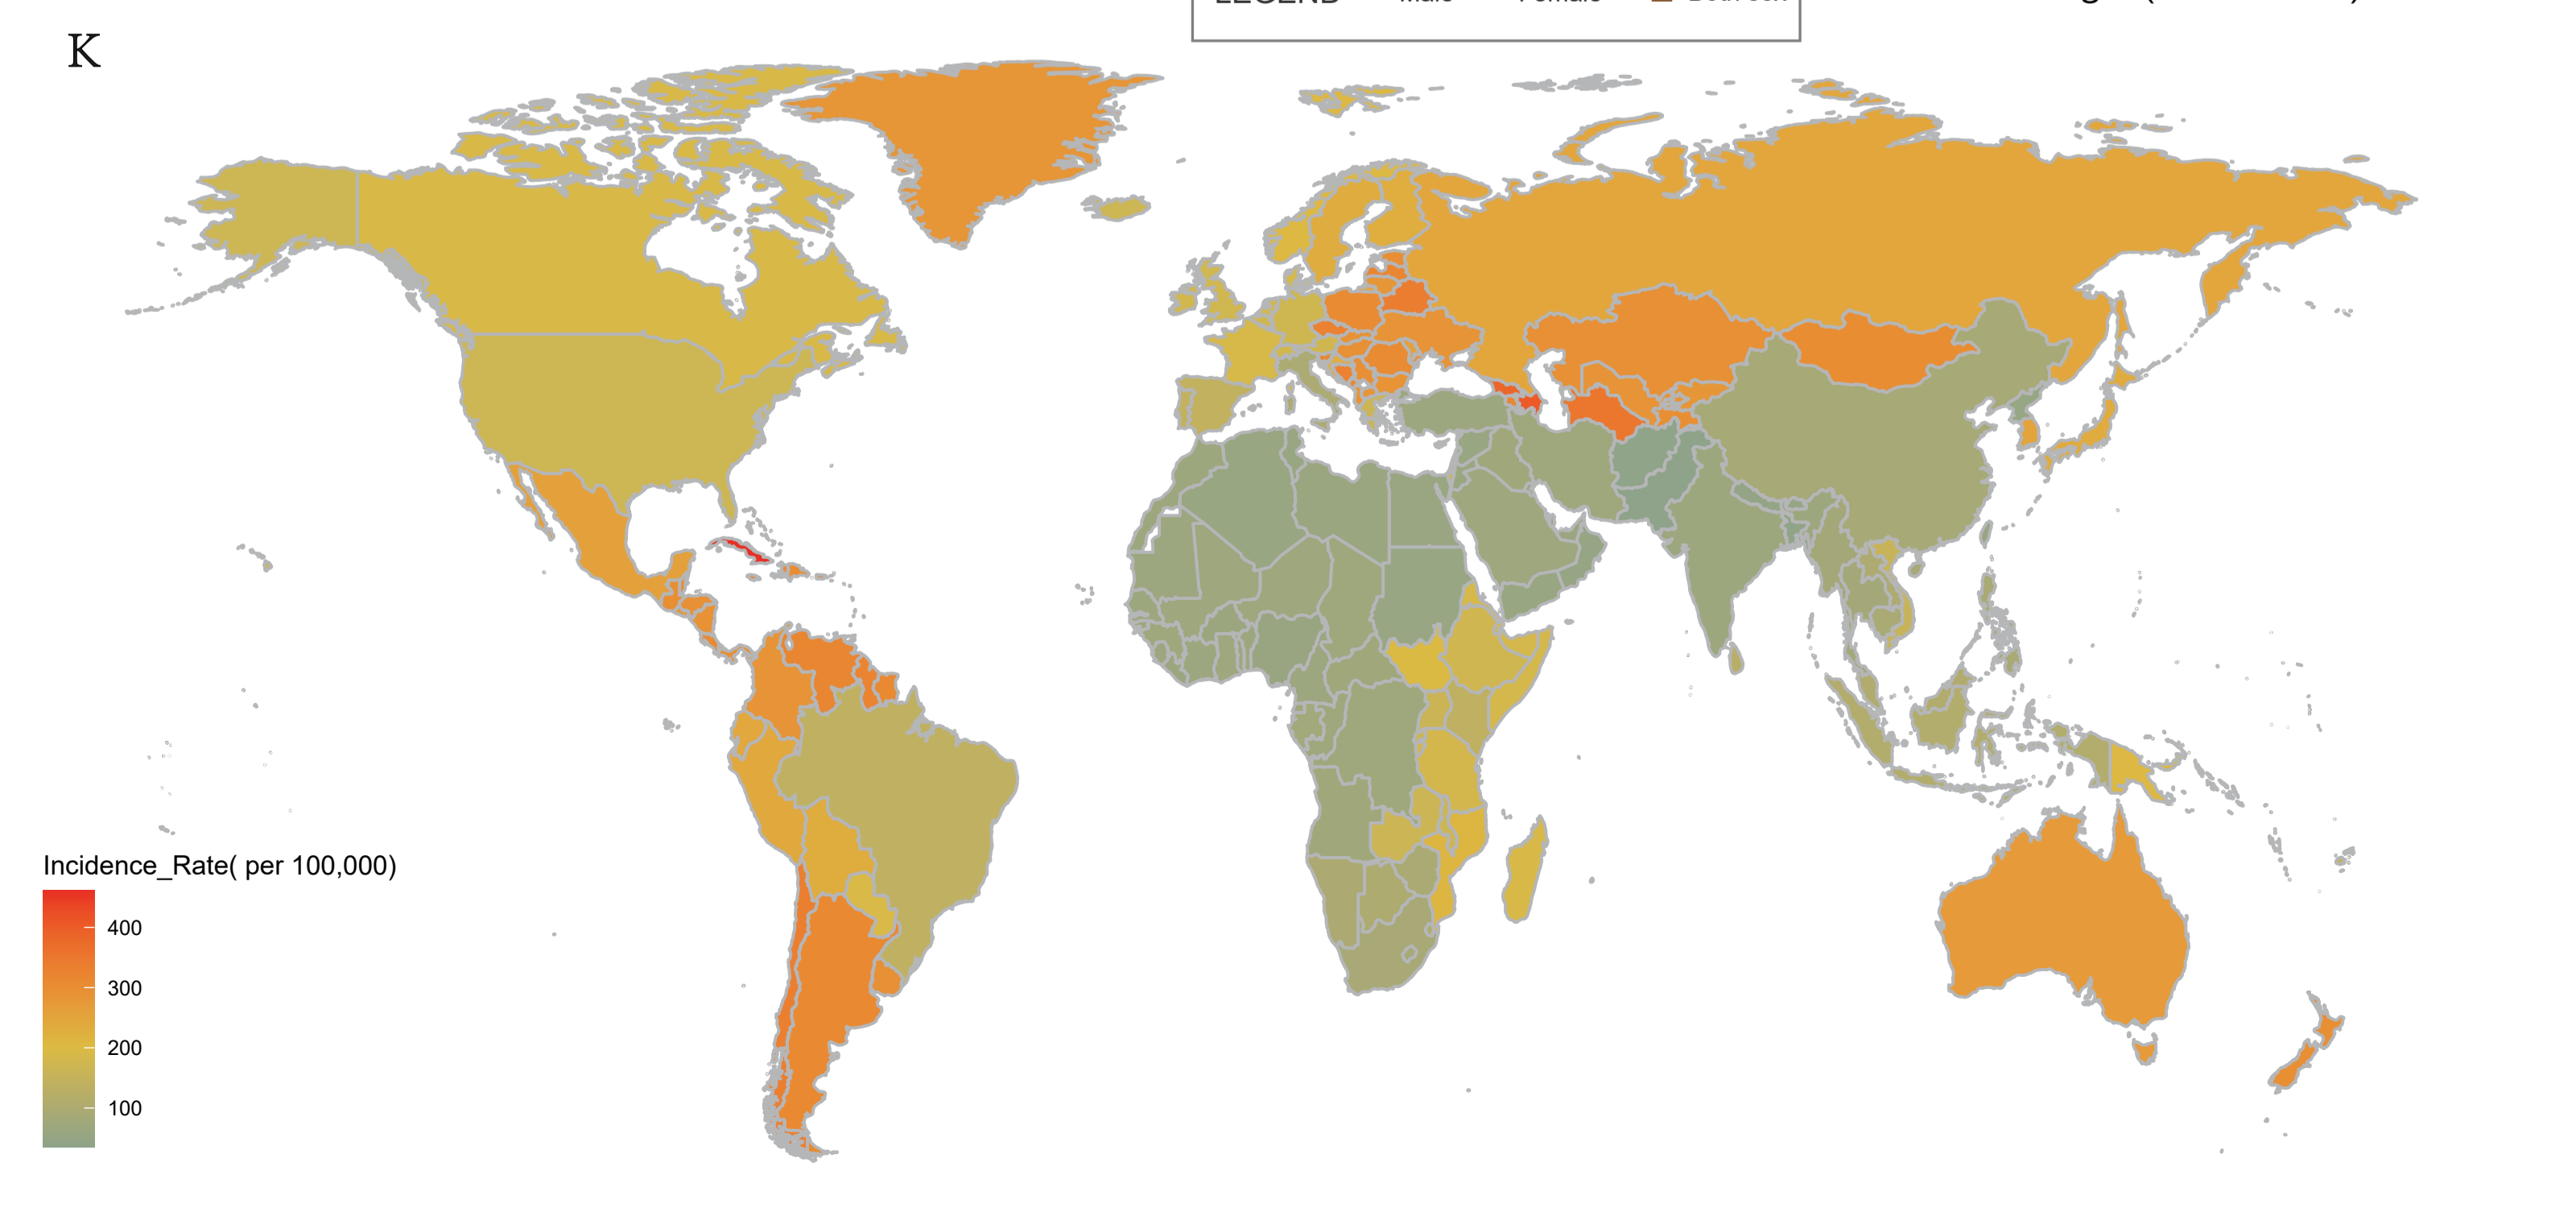

Supplement: 12889_2022_13887_MOESM1_ESM.pdf [file 12889_2022_13887_MOESM1_ESM.pdf]
