# Supplementary material for: The epidemiological characteristic and trends of burns globally
Source: PubMed Central journal article supplement (PMC9396832; doi:10.1186/s12889-022-13887-2), 2022-08-22
Supplement: 12889_2022_13887_MOESM6_ESM.pdf [file 12889_2022_13887_MOESM6_ESM.pdf]

**Table S3. GBD location hierarchy with levels**

| Geography                                        | level |
|--------------------------------------------------|-------|
| Global                                           | 0     |
| Low SDI                                          | 1     |
| Low-middle SDI                                   | 1     |
| Middle SDI                                       | 1     |
| High-middle SDI                                  | 1     |
| High SDI                                         | 1     |
| Central Europe, eastern Europe, and central Asia | 1     |
| Central Asia                                     | 2     |
| Armenia                                          | 3     |
| Azerbaijan                                       | 3     |
| Georgia                                          | 3     |
| Kazakhstan                                       | 3     |
| Kyrgyzstan                                       | 3     |
| Mongolia                                         | 3     |
| Tajikistan                                       | 3     |
| Turkmenistan                                     | 3     |
| Uzbekistan                                       | 3     |
| Central Europe                                   | 2     |
| Albania                                          | 3     |
| Bosnia and Herzegovina                           | 3     |
| Bulgaria                                         | 3     |
| Croatia                                          | 3     |
| Czech Republic                                   | 3     |
| Hungary                                          | 3     |
| Montenegro                                       | 3     |
| North Macedonia                                  | 3     |
| Poland                                           | 3     |
| Romania                                          | 3     |
| Serbia                                           | 3     |
| Slovakia                                         | 3     |
| Slovenia                                         | 3     |
| Eastern Europe                                   | 2     |
| Belarus                                          | 3     |
| Estonia                                          | 3     |
| Latvia                                           | 3     |
| Lithuania                                        | 3     |
| Moldova                                          | 3     |
| Russia                                           | 3     |
| Ukraine                                          | 3     |
| High income                                      | 1     |
| Australasia                                      | 2     |
| Australia                                        | 3     |
| New Zealand                                      | 3     |

|                          |   |
|--------------------------|---|
| High-income Asia Pacific | 2 |
| Brunei                   | 3 |
| Japan                    | 3 |
| Aichi                    | 4 |
| Akita                    | 4 |
| Aomori                   | 4 |
| Chiba                    | 4 |
| Ehime                    | 4 |
| Fukui                    | 4 |
| Fukuoka                  | 4 |
| Fukushima                | 4 |
| Gifu                     | 4 |
| Gunma                    | 4 |
| Hiroshima                | 4 |
| Hokkaidō                 | 4 |
| Hyōgo                    | 4 |
| Ibaraki                  | 4 |
| Ishikawa                 | 4 |
| Iwate                    | 4 |
| Kagawa                   | 4 |
| Kagoshima                | 4 |
| Kanagawa                 | 4 |
| Kōchi                    | 4 |
| Kumamoto                 | 4 |
| Kyōto                    | 4 |
| Mie                      | 4 |
| Miyagi                   | 4 |
| Miyazaki                 | 4 |
| Nagano                   | 4 |
| Nagasaki                 | 4 |
| Nara                     | 4 |
| Niigata                  | 4 |
| Ōita                     | 4 |
| Okayama                  | 4 |
| Okinawa                  | 4 |
| Ōsaka                    | 4 |
| Saga                     | 4 |
| Saitama                  | 4 |
| Shiga                    | 4 |
| Shimane                  | 4 |
| Shizuoka                 | 4 |
| Tochigi                  | 4 |
| Tokushima                | 4 |
| Tōkyō                    | 4 |
| Tottori                  | 4 |

|                           |   |
|---------------------------|---|
| Toyama                    | 4 |
| Wakayama                  | 4 |
| Yamagata                  | 4 |
| Yamaguchi                 | 4 |
| Yamanashi                 | 4 |
| South Korea               | 3 |
| Singapore                 | 3 |
| High-income North America | 2 |
| Canada                    | 3 |
| Greenland                 | 3 |
| USA                       | 3 |
| Alabama                   | 4 |
| Alaska                    | 4 |
| Arizona                   | 4 |
| Arkansas                  | 4 |
| California                | 4 |
| Colorado                  | 4 |
| Connecticut               | 4 |
| Delaware                  | 4 |
| Washington, DC            | 4 |
| Florida                   | 4 |
| Georgia                   | 4 |
| Hawaii                    | 4 |
| Idaho                     | 4 |
| Illinois                  | 4 |
| Indiana                   | 4 |
| Iowa                      | 4 |
| Kansas                    | 4 |
| Kentucky                  | 4 |
| Louisiana                 | 4 |
| Maine                     | 4 |
| Maryland                  | 4 |
| Massachusetts             | 4 |
| Michigan                  | 4 |
| Minnesota                 | 4 |
| Mississippi               | 4 |
| Missouri                  | 4 |
| Montana                   | 4 |
| Nebraska                  | 4 |
| Nevada                    | 4 |
| New Hampshire             | 4 |
| New Jersey                | 4 |
| New Mexico                | 4 |
| New York                  | 4 |
| North Carolina            | 4 |

|                        |   |
|------------------------|---|
| North Dakota           | 4 |
| Ohio                   | 4 |
| Oklahoma               | 4 |
| Oregon                 | 4 |
| Pennsylvania           | 4 |
| Rhode Island           | 4 |
| South Carolina         | 4 |
| South Dakota           | 4 |
| Tennessee              | 4 |
| Texas                  | 4 |
| Utah                   | 4 |
| Vermont                | 4 |
| Virginia               | 4 |
| Washington             | 4 |
| West Virginia          | 4 |
| Wisconsin              | 4 |
| Wyoming                | 4 |
| Southern Latin America | 2 |
| Argentina              | 3 |
| Chile                  | 3 |
| Uruguay                | 3 |
| Western Europe         | 2 |
| Andorra                | 3 |
| Austria                | 3 |
| Belgium                | 3 |
| Cyprus                 | 3 |
| Denmark                | 3 |
| Finland                | 3 |
| France                 | 3 |
| Germany                | 3 |
| Greece                 | 3 |
| Iceland                | 3 |
| Ireland                | 3 |
| Israel                 | 3 |
| Italy                  | 3 |
| Luxembourg             | 3 |
| Malta                  | 3 |
| Monaco                 | 3 |
| Netherlands            | 3 |
| Norway                 | 3 |
| Portugal               | 3 |
| San Marino             | 3 |
| Spain                  | 3 |
| Sweden                 | 3 |
| Stockholm              | 4 |

|                         |   |
|-------------------------|---|
| Sweden except Stockholm | 4 |
| Switzerland             | 3 |
| UK                      | 3 |
| England                 | 4 |
| East Midlands           | 5 |
| Derby                   | 6 |
| Derbyshire              | 6 |
| Leicester               | 6 |
| Leicestershire          | 6 |
| Lincolnshire            | 6 |
| Northamptonshire        | 6 |
| Nottingham              | 6 |
| Nottinghamshire         | 6 |
| Rutland                 | 6 |
| East of England         | 5 |
| Bedford                 | 6 |
| Cambridgeshire          | 6 |
| Central Bedfordshire    | 6 |
| Essex                   | 6 |
| Hertfordshire           | 6 |
| Luton                   | 6 |
| Norfolk                 | 6 |
| Peterborough            | 6 |
| Southend-on-Sea         | 6 |
| Suffolk                 | 6 |
| Thurrock                | 6 |
| Greater London          | 5 |
| Barking and Dagenham    | 6 |
| Barnet                  | 6 |
| Bexley                  | 6 |
| Brent                   | 6 |
| Bromley                 | 6 |
| Camden                  | 6 |
| Croydon                 | 6 |
| Ealing                  | 6 |
| Enfield                 | 6 |
| Greenwich               | 6 |
| Hackney                 | 6 |
| Hammersmith and Fulham  | 6 |
| Haringey                | 6 |
| Harrow                  | 6 |
| Havering                | 6 |
| Hillingdon              | 6 |
| Hounslow                | 6 |
| Islington               | 6 |

|                           |   |
|---------------------------|---|
| Kensington and Chelsea    | 6 |
| Kingston upon Thames      | 6 |
| Lambeth                   | 6 |
| Lewisham                  | 6 |
| Merton                    | 6 |
| Newham                    | 6 |
| Redbridge                 | 6 |
| Richmond upon Thames      | 6 |
| Southwark                 | 6 |
| Sutton                    | 6 |
| Tower Hamlets             | 6 |
| Waltham Forest            | 6 |
| Wandsworth                | 6 |
| Westminster               | 6 |
| North East England        | 5 |
| County Durham             | 6 |
| Darlington                | 6 |
| Gateshead                 | 6 |
| Hartlepool                | 6 |
| Middlesbrough             | 6 |
| Newcastle upon Tyne       | 6 |
| North Tyneside            | 6 |
| Northumberland            | 6 |
| Redcar and Cleveland      | 6 |
| South Tyneside            | 6 |
| Stockton-on-Tees          | 6 |
| Sunderland                | 6 |
| North West England        | 5 |
| Blackburn with Darwen     | 6 |
| Blackpool                 | 6 |
| Bolton                    | 6 |
| Bury                      | 6 |
| Cheshire East             | 6 |
| Cheshire West and Chester | 6 |
| Cumbria                   | 6 |
| Halton                    | 6 |
| Knowsley                  | 6 |
| Lancashire                | 6 |
| Liverpool                 | 6 |
| Manchester                | 6 |
| Oldham                    | 6 |
| Rochdale                  | 6 |
| Salford                   | 6 |
| Sefton                    | 6 |
| St Helens                 | 6 |

|                              |   |
|------------------------------|---|
| Stockport                    | 6 |
| Tameside                     | 6 |
| Trafford                     | 6 |
| Warrington                   | 6 |
| Wigan                        | 6 |
| Wirral                       | 6 |
| South East England           | 5 |
| Bracknell Forest             | 6 |
| Brighton and Hove            | 6 |
| Buckinghamshire              | 6 |
| East Sussex                  | 6 |
| Hampshire                    | 6 |
| Isle of Wight                | 6 |
| Kent                         | 6 |
| Medway                       | 6 |
| Milton Keynes                | 6 |
| Oxfordshire                  | 6 |
| Portsmouth                   | 6 |
| Reading                      | 6 |
| Slough                       | 6 |
| Southampton                  | 6 |
| Surrey                       | 6 |
| West Berkshire               | 6 |
| West Sussex                  | 6 |
| Windsor and Maidenhead       | 6 |
| Wokingham                    | 6 |
| South West England           | 5 |
| Bath and North East Somerset | 6 |
| Bournemouth                  | 6 |
| Bristol, City of             | 6 |
| Cornwall                     | 6 |
| Devon                        | 6 |
| Dorset                       | 6 |
| Gloucestershire              | 6 |
| North Somerset               | 6 |
| Plymouth                     | 6 |
| Poole                        | 6 |
| Somerset                     | 6 |
| South Gloucestershire        | 6 |
| Swindon                      | 6 |
| Torbay                       | 6 |
| Wiltshire                    | 6 |
| West Midlands                | 5 |
| Birmingham                   | 6 |
| Coventry                     | 6 |

|                             |   |
|-----------------------------|---|
| Dudley                      | 6 |
| Herefordshire, County of    | 6 |
| Sandwell                    | 6 |
| Shropshire                  | 6 |
| Solihull                    | 6 |
| Staffordshire               | 6 |
| Stoke-on-Trent              | 6 |
| Telford and Wrekin          | 6 |
| Walsall                     | 6 |
| Warwickshire                | 6 |
| Wolverhampton               | 6 |
| Worcestershire              | 6 |
| Yorkshire and the Humber    | 5 |
| Barnsley                    | 6 |
| Bradford                    | 6 |
| Calderdale                  | 6 |
| Doncaster                   | 6 |
| East Riding of Yorkshire    | 6 |
| Kingston upon Hull, City of | 6 |
| Kirklees                    | 6 |
| Leeds                       | 6 |
| North East Lincolnshire     | 6 |
| North Lincolnshire          | 6 |
| North Yorkshire             | 6 |
| Rotherham                   | 6 |
| Sheffield                   | 6 |
| Wakefield                   | 6 |
| York                        | 6 |
| Northern Ireland            | 4 |
| Scotland                    | 4 |
| Wales                       | 4 |
| Latin America and Caribbean | 1 |
| Andean Latin America        | 2 |
| Bolivia                     | 3 |
| Ecuador                     | 3 |
| Peru                        | 3 |
| Caribbean                   | 2 |
| Antigua and Barbuda         | 3 |
| The Bahamas                 | 3 |
| Barbados                    | 3 |
| Belize                      | 3 |
| Bermuda                     | 3 |
| Cuba                        | 3 |
| Dominica                    | 3 |
| Dominican Republic          | 3 |



|                                  |   |
|----------------------------------|---|
| Grenada                          | 3 |
| Guyana                           | 3 |
| Haiti                            | 3 |
| Jamaica                          | 3 |
| Puerto Rico                      | 3 |
| Saint Kitts and Nevis            | 3 |
| Saint Lucia                      | 3 |
| Saint Vincent and the Grenadines | 3 |
| Suriname                         | 3 |
| Trinidad and Tobago              | 3 |
| Virgin Islands                   | 3 |
| Central Latin America            | 2 |
| Colombia                         | 3 |
| Costa Rica                       | 3 |
| El Salvador                      | 3 |
| Guatemala                        | 3 |
| Honduras                         | 3 |
| Mexico                           | 3 |
| Aguascalientes                   | 4 |
| Baja California                  | 4 |
| Baja California Sur              | 4 |
| Campeche                         | 4 |
| Chiapas                          | 4 |
| Chihuahua                        | 4 |
| Coahuila                         | 4 |
| Colima                           | 4 |
| Durango                          | 4 |
| Guanajuato                       | 4 |
| Guerrero                         | 4 |
| Hidalgo                          | 4 |
| Jalisco                          | 4 |
| México                           | 4 |
| Mexico City                      | 4 |
| Michoacán de Ocampo              | 4 |
| Morelos                          | 4 |
| Nayarit                          | 4 |
| Nuevo León                       | 4 |
| Oaxaca                           | 4 |
| Puebla                           | 4 |
| Querétaro                        | 4 |
| Quintana Roo                     | 4 |
| San Luis Potosí                  | 4 |
| Sinaloa                          | 4 |
| Sonora                           | 4 |
| Tabasco                          | 4 |

|                                 |   |
|---------------------------------|---|
| Tamaulipas                      | 4 |
| Tlaxcala                        | 4 |
| Veracruz de Ignacio de la Llave | 4 |
| Yucatán                         | 4 |
| Zacatecas                       | 4 |
| Nicaragua                       | 3 |
| Panama                          | 3 |
| Venezuela                       | 3 |
| Tropical Latin America          | 2 |
| Brazil                          | 3 |
| Acre                            | 4 |
| Alagoas                         | 4 |
| Amapá                           | 4 |
| Amazonas                        | 4 |
| Bahia                           | 4 |
| Ceará                           | 4 |
| Distrito Federal                | 4 |
| Espírito Santo                  | 4 |
| Goiás                           | 4 |
| Maranhão                        | 4 |
| Mato Grosso                     | 4 |
| Mato Grosso do Sul              | 4 |
| Minas Gerais                    | 4 |
| Pará                            | 4 |
| Paraíba                         | 4 |
| Paraná                          | 4 |
| Pernambuco                      | 4 |
| Piauí                           | 4 |
| Rio de Janeiro                  | 4 |
| Rio Grande do Norte             | 4 |
| Rio Grande do Sul               | 4 |
| Rondônia                        | 4 |
| Roraima                         | 4 |
| Santa Catarina                  | 4 |
| São Paulo                       | 4 |
| Sergipe                         | 4 |
| Tocantins                       | 4 |
| Paraguay                        | 3 |
| North Africa and Middle East    | 1 |
| North Africa and Middle East    | 2 |
| Afghanistan                     | 3 |
| Algeria                         | 3 |
| Bahrain                         | 3 |
| Egypt                           | 3 |
| Iran                            | 3 |

|                            |   |
|----------------------------|---|
| Iraq                       | 3 |
| Jordan                     | 3 |
| Kuwait                     | 3 |
| Lebanon                    | 3 |
| Libya                      | 3 |
| Morocco                    | 3 |
| Oman                       | 3 |
| Palestine                  | 3 |
| Qatar                      | 3 |
| Saudi Arabia               | 3 |
| Sudan                      | 3 |
| Syria                      | 3 |
| Tunisia                    | 3 |
| Turkey                     | 3 |
| United Arab Emirates       | 3 |
| Yemen                      | 3 |
| South Asia                 | 1 |
| South Asia                 | 2 |
| Bangladesh                 | 3 |
| Bhutan                     | 3 |
| India                      | 3 |
| Andhra Pradesh             | 4 |
| Arunachal Pradesh          | 4 |
| Assam                      | 4 |
| Bihar C                    | 4 |
| hhattisgarh                | 4 |
| Delhi                      | 4 |
| Goa                        | 4 |
| Gujarat                    | 4 |
| Haryana                    | 4 |
| Himachal Pradesh           | 4 |
| Jammu & Kashmir and Ladakh | 4 |
| Jharkhand                  | 4 |
| Karnataka                  | 4 |
| Kerala                     | 4 |
| Madhya Pradesh             | 4 |
| Maharashtra                | 4 |
| Manipur                    | 4 |
| Meghalaya                  | 4 |
| Mizoram                    | 4 |
| Nagaland                   | 4 |
| Odisha                     | 4 |
| Punjab                     | 4 |
| Rajasthan                  | 4 |
| Sikkim                     | 4 |

|                                        |   |
|----------------------------------------|---|
| Tamil Nadu                             | 4 |
| Telangana                              | 4 |
| Tripura                                | 4 |
| Other Union Territories                | 4 |
| Uttar Pradesh                          | 4 |
| Uttarakhand                            | 4 |
| West Bengal                            | 4 |
| Nepal                                  | 3 |
| Pakistan                               | 3 |
| Southeast Asia, east Asia, and Oceania | 1 |
| East Asia                              | 2 |
| China                                  | 3 |
| North Korea                            | 3 |
| Taiwan (province of China)             | 3 |
| Oceania                                | 2 |
| American Samoa                         | 3 |
| Cook Islands                           | 3 |
| Fiji                                   | 3 |
| Guam                                   | 3 |
| Kiribati                               | 3 |
| Marshall Islands                       | 3 |
| Federated States of Micronesia         | 3 |
| Nauru                                  | 3 |
| Niue                                   | 3 |
| Northern Mariana Islands               | 3 |
| Palau                                  | 3 |
| Papua New Guinea                       | 3 |
| Samoa                                  | 3 |
| Solomon Islands                        | 3 |
| Tokelau                                | 3 |
| Tonga                                  | 3 |
| Tuvalu                                 | 3 |
| Vanuatu                                | 3 |
| Southeast Asia                         | 2 |
| Cambodia                               | 3 |
| Indonesia                              | 3 |
| Aceh                                   | 4 |
| Bali                                   | 4 |
| Bangka-Belitung Islands                | 4 |
| Banten                                 | 4 |
| Bengkulu                               | 4 |
| Gorontalo                              | 4 |
| Jakarta                                | 4 |
| Jambi                                  | 4 |
| West Java                              | 4 |

|                            |   |
|----------------------------|---|
| Central Java               | 4 |
| East Java                  | 4 |
| West Kalimantan            | 4 |
| South Kalimantan           | 4 |
| Central Kalimantan         | 4 |
| East Kalimantan            | 4 |
| North Kalimantan           | 4 |
| Riau Islands               | 4 |
| Lampung                    | 4 |
| Maluku                     | 4 |
| North Maluku               | 4 |
| West Nusa Tenggara         | 4 |
| East Nusa Tenggara         | 4 |
| Papua                      | 4 |
| West Papua                 | 4 |
| Riau                       | 4 |
| West Sulawesi              | 4 |
| South Sulawesi             | 4 |
| Central Sulawesi           | 4 |
| Southeast Sulawesi         | 4 |
| North Sulawesi             | 4 |
| West Sumatra               | 4 |
| South Sumatra              | 4 |
| North Sumatra              | 4 |
| Yogyakarta                 | 4 |
| Laos                       | 3 |
| Malaysia                   | 3 |
| Maldives                   | 3 |
| Mauritius                  | 3 |
| Myanmar                    | 3 |
| Philippines                | 3 |
| Seychelles                 | 3 |
| Sri Lanka                  | 3 |
| Thailand                   | 3 |
| Timor-Leste                | 3 |
| Vietnam                    | 3 |
| Sub-Saharan Africa         | 1 |
| Central sub-Saharan Africa | 2 |
| Angola                     | 3 |
| Central African Republic   | 3 |
| Congo (Brazzaville)        | 3 |
| DR Congo                   | 3 |
| Equatorial Guinea          | 3 |
| Gabon                      | 3 |
| Eastern sub-Saharan Africa | 2 |

|                 |   |
|-----------------|---|
| Burundi         | 3 |
| Comoros         | 3 |
| Djibouti        | 3 |
| Eritrea         | 3 |
| Ethiopia        | 3 |
| Kenya           | 3 |
| Baringo         | 4 |
| Bomet           | 4 |
| Bungoma         | 4 |
| Busia           | 4 |
| Elgeyo Marakwet | 4 |
| Embu            | 4 |
| Garissa         | 4 |
| Homa Bay        | 4 |
| Isiolo          | 4 |
| Kajiado         | 4 |
| Kakamega        | 4 |
| Kericho         | 4 |
| Kiambu          | 4 |
| Kilifi          | 4 |
| Kirinyaga       | 4 |
| Kisii           | 4 |
| Kisumu          | 4 |
| Kitui           | 4 |
| Kwale           | 4 |
| Laikipia        | 4 |
| Lamu            | 4 |
| Machakos        | 4 |
| Makueni         | 4 |
| Mandera         | 4 |
| Marsabit        | 4 |
| Meru            | 4 |
| Migori          | 4 |
| Mombasa         | 4 |
| Murang'a        | 4 |
| Nairobi         | 4 |
| Nakuru          | 4 |
| Nandi           | 4 |
| Narok           | 4 |
| Nyamira         | 4 |
| Nyandarua       | 4 |
| Nyeri           | 4 |
| Samburu         | 4 |
| Siaya           | 4 |
| Taita Taveta    | 4 |

|                             |   |
|-----------------------------|---|
| Tana River                  | 4 |
| Tharaka Nithi               | 4 |
| Trans Nzoia                 | 4 |
| Turkana                     | 4 |
| Uasin Gishu                 | 4 |
| Vihiga                      | 4 |
| Wajir                       | 4 |
| West Pokot                  | 4 |
| Madagascar                  | 3 |
| Malawi                      | 3 |
| Mozambique                  | 3 |
| Rwanda                      | 3 |
| Somalia                     | 3 |
| South Sudan                 | 3 |
| Uganda                      | 3 |
| Tanzania                    | 3 |
| Zambia                      | 3 |
| Southern sub-Saharan Africa | 2 |
| Botswana                    | 3 |
| eSwatini                    | 3 |
| Lesotho                     | 3 |
| Namibia                     | 3 |
| South Africa                | 3 |
| Zimbabwe                    | 3 |
| Western sub-Saharan Africa  | 2 |
| Benin                       | 3 |
| Burkina Faso                | 3 |
| Cape Verde                  | 3 |
| Cameroon                    | 3 |
| Chad                        | 3 |
| Côte d'Ivoire               | 3 |
| The Gambia                  | 3 |
| Ghana                       | 3 |
| Guinea                      | 3 |
| Guinea-Bissau               | 3 |
| Liberia                     | 3 |
| Mali                        | 3 |
| Mauritania                  | 3 |
| Niger                       | 3 |
| Nigeria                     | 3 |
| São Tomé and Príncipe       | 3 |
| Senegal                     | 3 |
| Sierra Leone                | 3 |
| Togo                        | 3 |
